# Supplementary material
Source: Springer Nature journal article supplement (https://www.springermedizin.de/resource/supplementary/12916_2012_664_MOESM3_ESM.pdf/9598018)

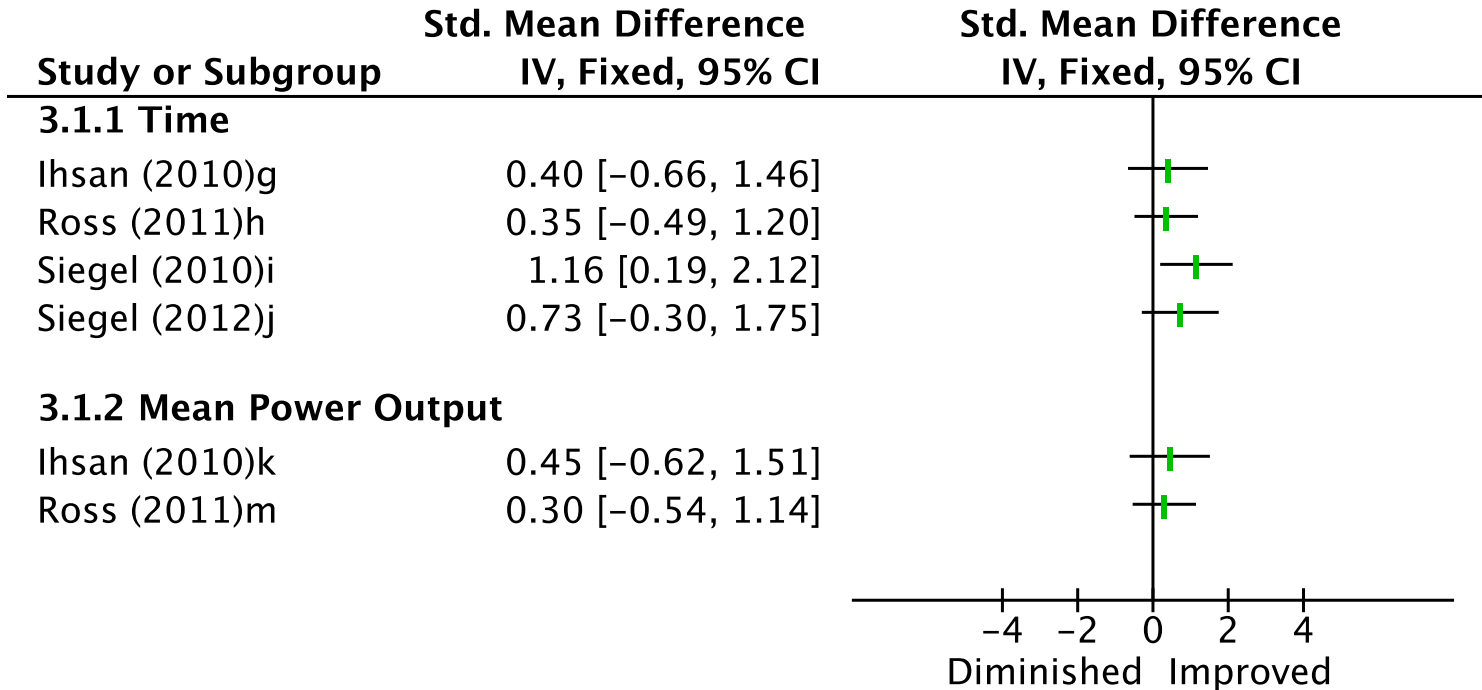

Supplement: MOESM3 [file 9598018]
